# Supplementary material for: Mercaptothiadiazole capped gold nanoparticles as fluorophore for the determination of nanomolar mercury(ii) in aqueous solution in the presence of 50 000-fold major interferents
Source: Royal Society of Chemistry journal article supplement (doi:10.1039/c2an35190k), 2012-01-01

## **Supporting Information**

**Mercaptothiadiazole capped gold nanoparticles as fluorophore for the determination of nanomolar mercury (II) in aqueous solution in the presence of 50,000-fold major interferents**

**N. Vasimalai and S. Abraham John\***

*Department of Chemistry, Gandhigram Rural Institute  
Gandhigram – 624 302, Dindigul, Tamilnadu, India.*

**Scheme S1.** Possible complexation mode between DMT-AuNPs and Hg(II) (Not up to the scale)

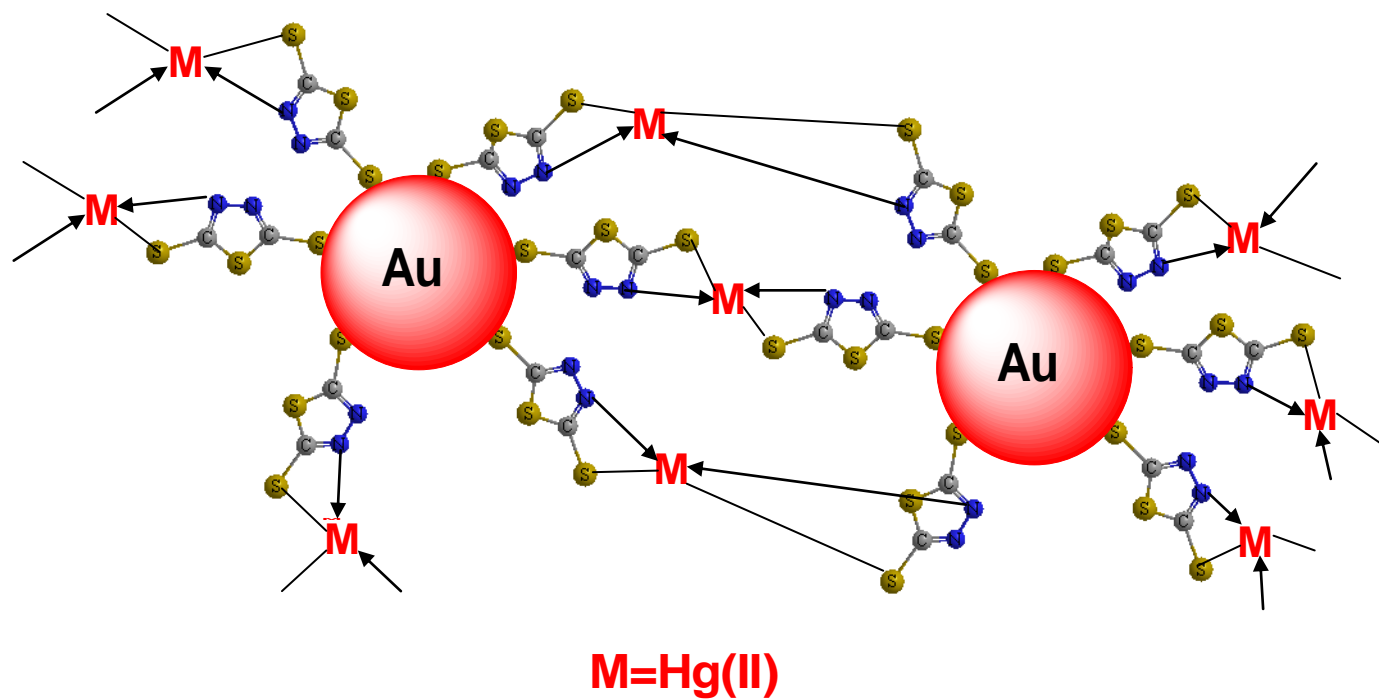

**Fig. S1.** UV-visible spectra of DMT-AuNPs in different concentrations of Hg(II) (a) 0, (b) 10, (c) 20, (d) 30, (e) 40, (f) 50, (g) 60, (h) 70, (i) 80, (j) 90, (k) 100, (l) 110 and (m)  $120 \times 10^{-6}$  mol L<sup>-1</sup>.

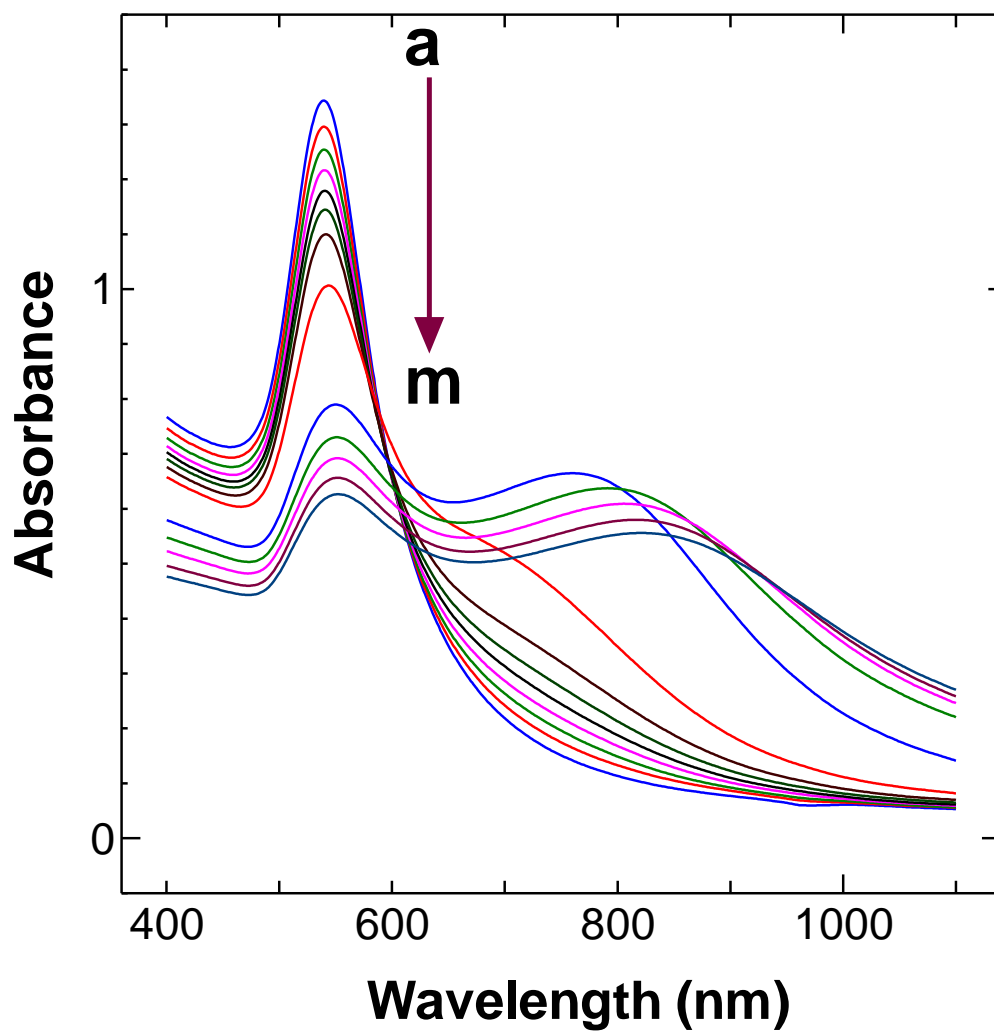

**Fig. S2.** Emission spectra of DMT-AuNPs in different concentrations of Hg(II) (a) 0, (b) 1, (c) 2, (d) 3, (e) 4, (f) 5, (g) 6, (h) 7, (i) 8, (j) 9 and (k)  $10 \times 10^{-6}$  mol L<sup>-1</sup> ( $\lambda_{\text{ex}}$ : 514;  $\lambda_{\text{em}}$ : 773 nm). **Inset:** Emission spectra of (a) DMT capped AuNPs and (b) DMT free AuNPs ( $\lambda_{\text{ex}}$ : 330;  $\lambda_{\text{em}}$ : 435 nm).

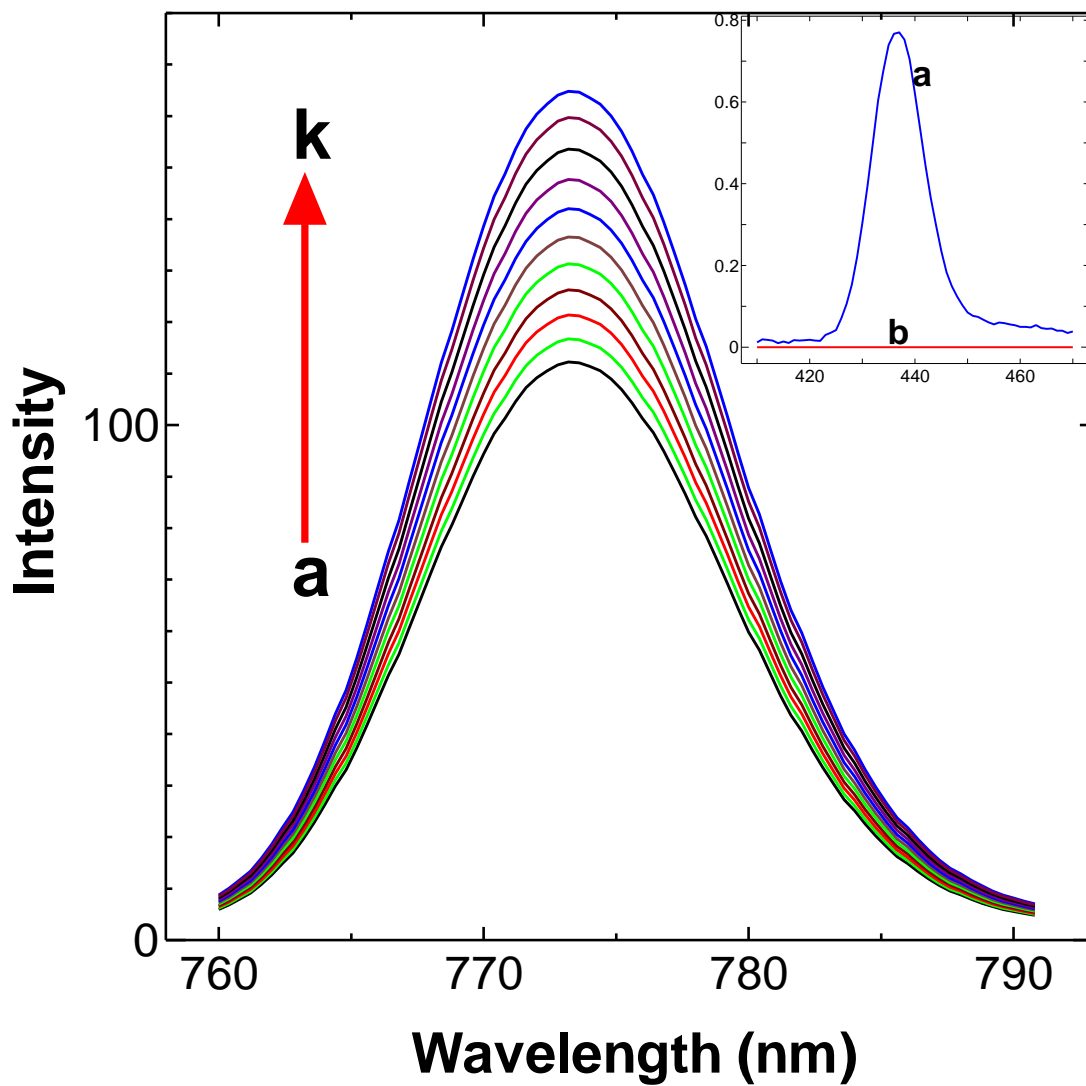

**Fig. S3.** Linearity plot for DMT-AuNPs in  $1 \times 10^{-12}$  to  $1 \times 10^{-7}$  M/L concentrations of Hg(II). **Inset:** Expanded linearity plot for DMT-AuNPs in  $1 \times 10^{-12}$  to  $1 \times 10^{-9}$  M/L concentrations of Hg(II).

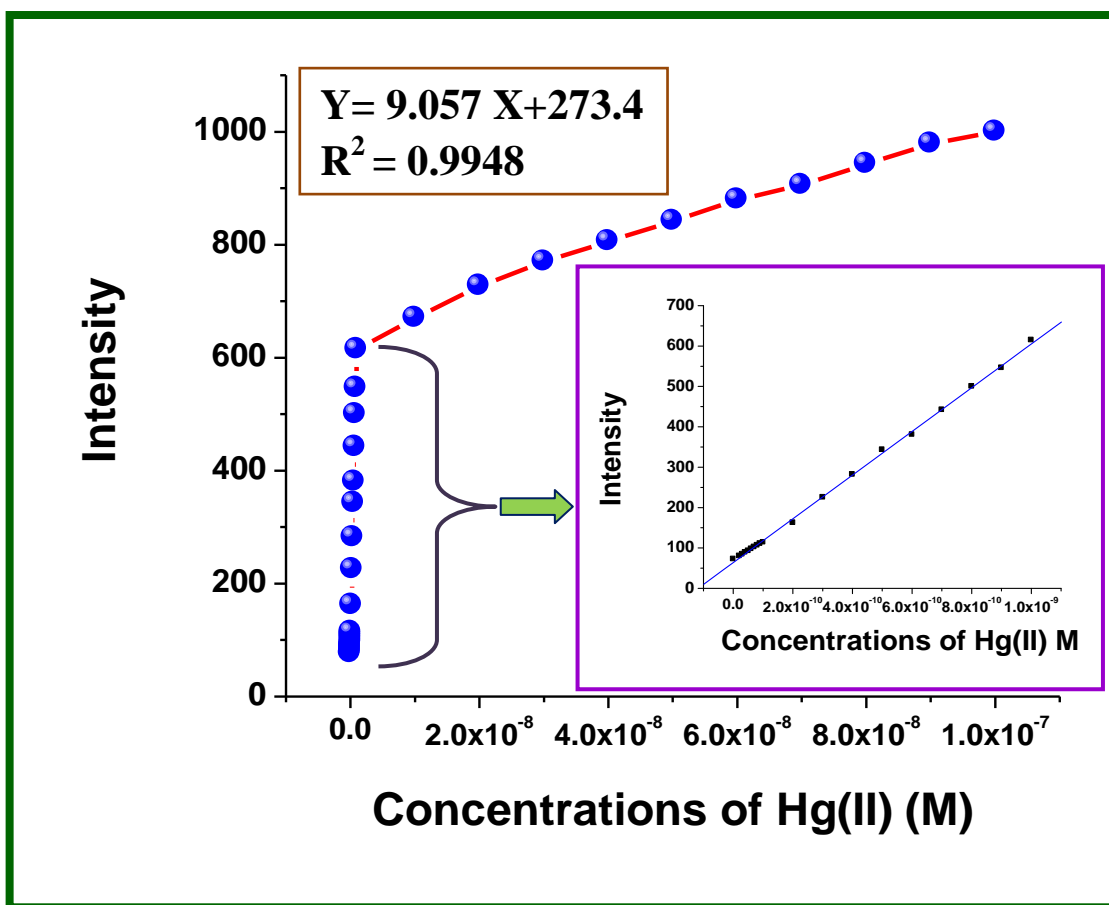

Supplement: c2an35190k.pdf [file c2an35190k.pdf]
